# Supplementary material
Source: MDPI journal article supplement (https://www.mdpi.com/2304-6740/12/2/36)
Supplement: s1 [file s1]

## Supporting Information:

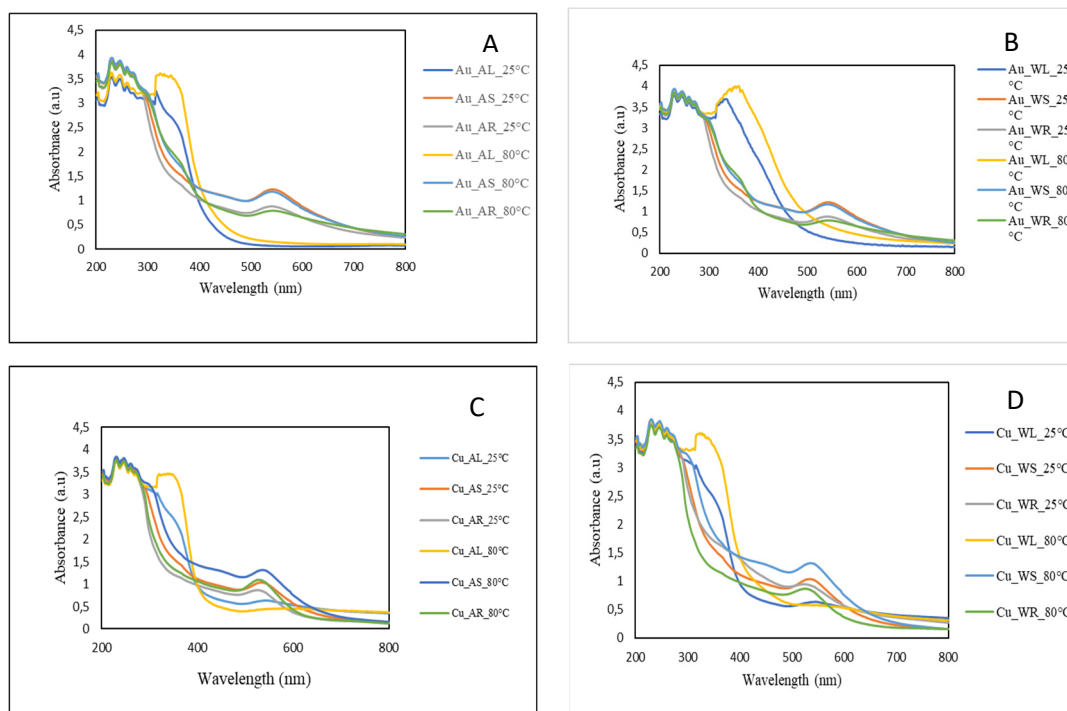

Sample keys : AL=acetone Leaf; AS=acetone stem; AR=acetone root; WL=water leaf; WS= water stem;WR=water root.

**Figure S1** The UV-Vis data of AuNFs, NPs (A and B) and CuNPs (C and D). Legends denotes extracts from which nanoparticles were synthesised.

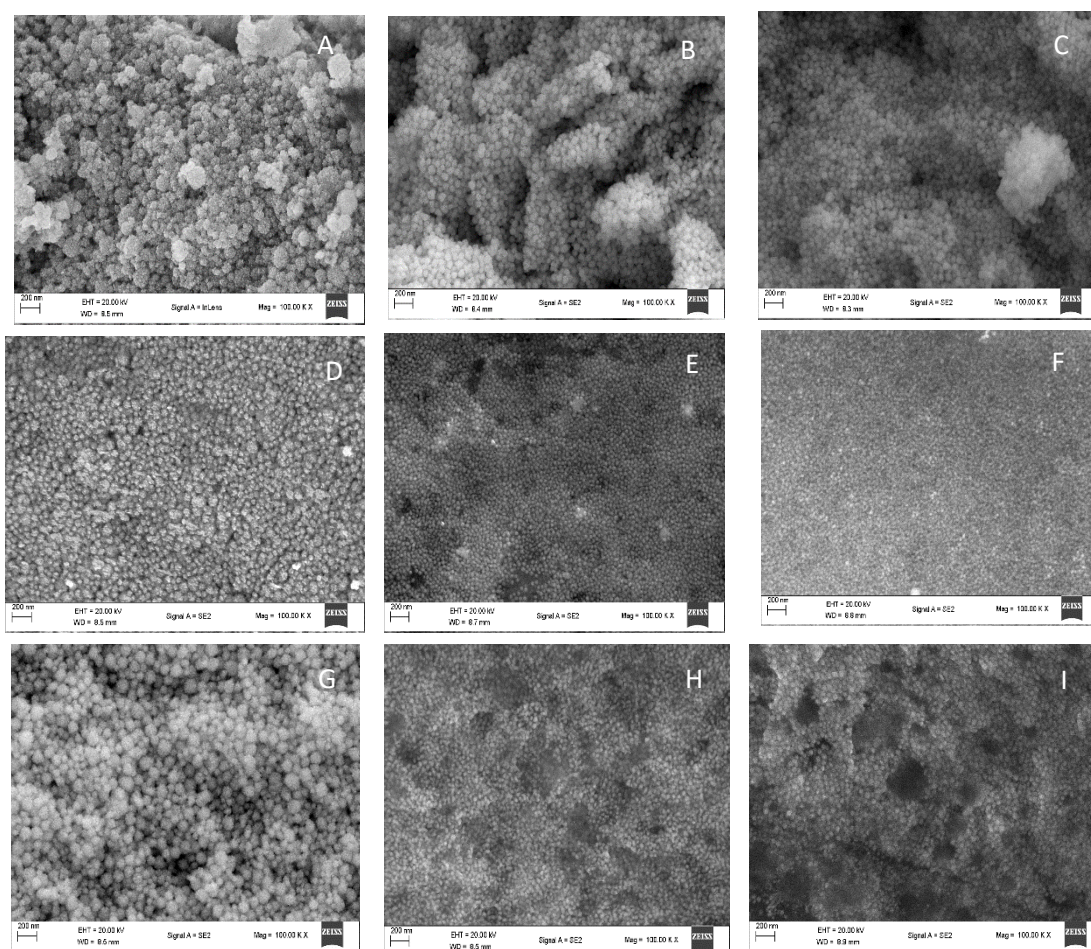

**Figure S2** SEM micrographs of AuNFs and AuNPs synthesised from leaf, stem and root methanol (A – C), acetone (D – F) and water (G – I) extracts, of *Lankea discolor*.

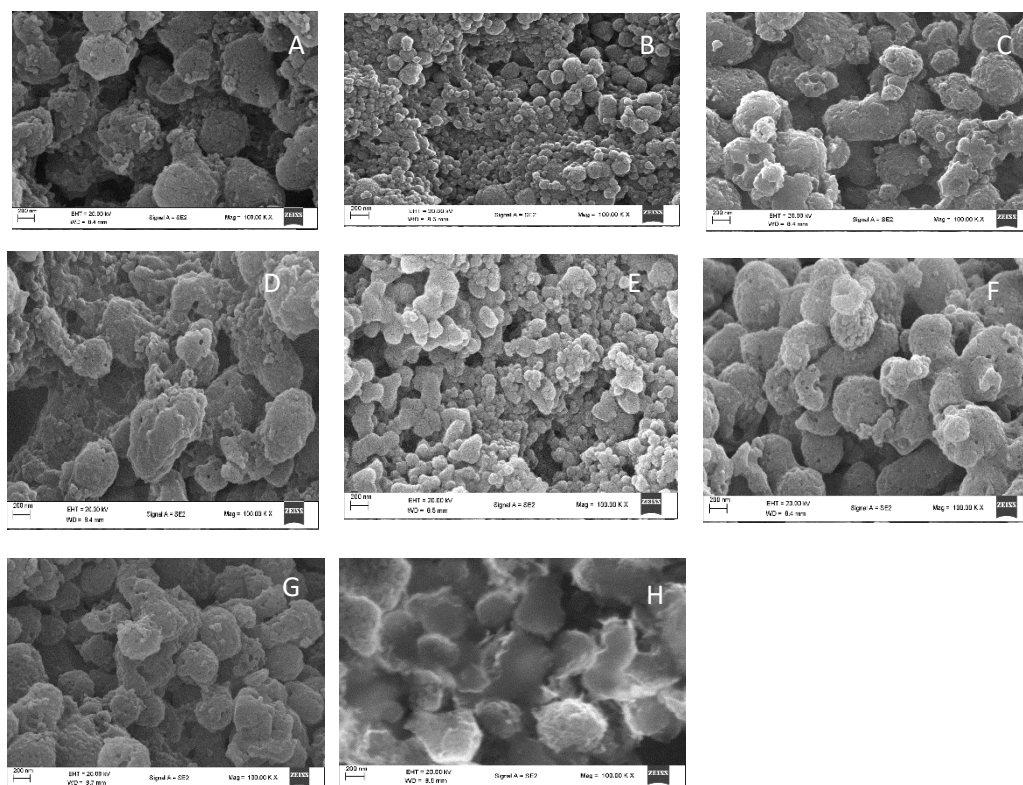

**Figure S3** Representative SEM images of CuNPs from *Lannea discolor* leaf, stem and root methanol (A – C), acetone (D – F) and water (G – H) extracts.

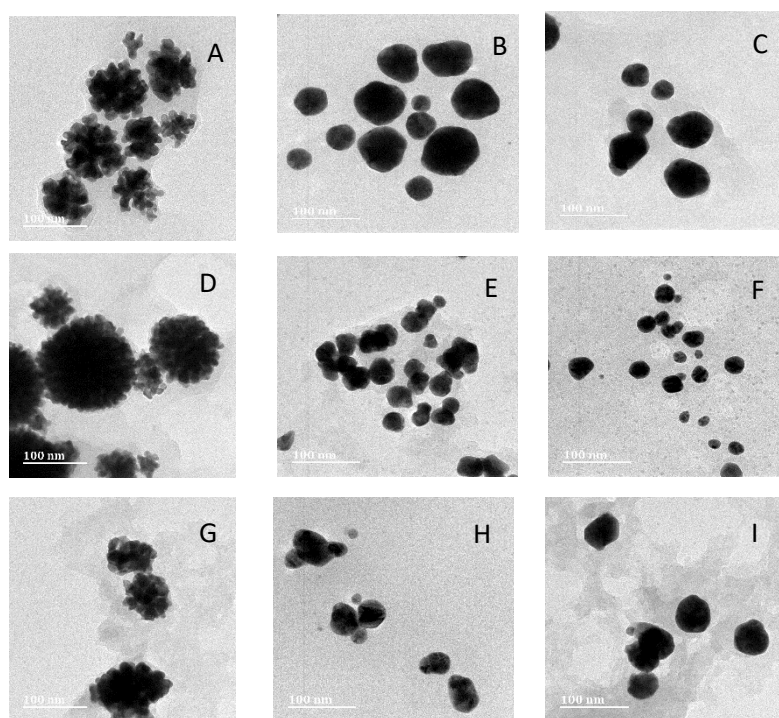

**Figure S4** TEM images of the synthesised AuNFs and AuNPs. A, D and G show AuNFs synthesised from leaf methanol, acetone, and water extracts, respectively. AuNPs synthesised from methanol, acetone, and water stem and roots extracts are shown in micrographs B, C, E, F, H and I.

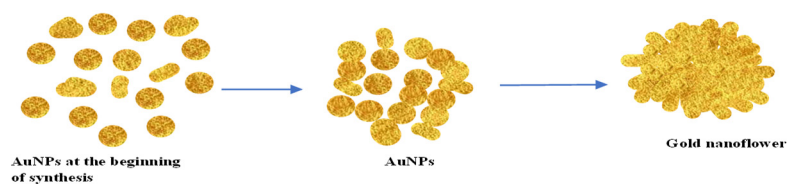

Figure S5. Schematic diagram showing proposed growth mechanism of AuNFs from *Lannea discolor* leaves.

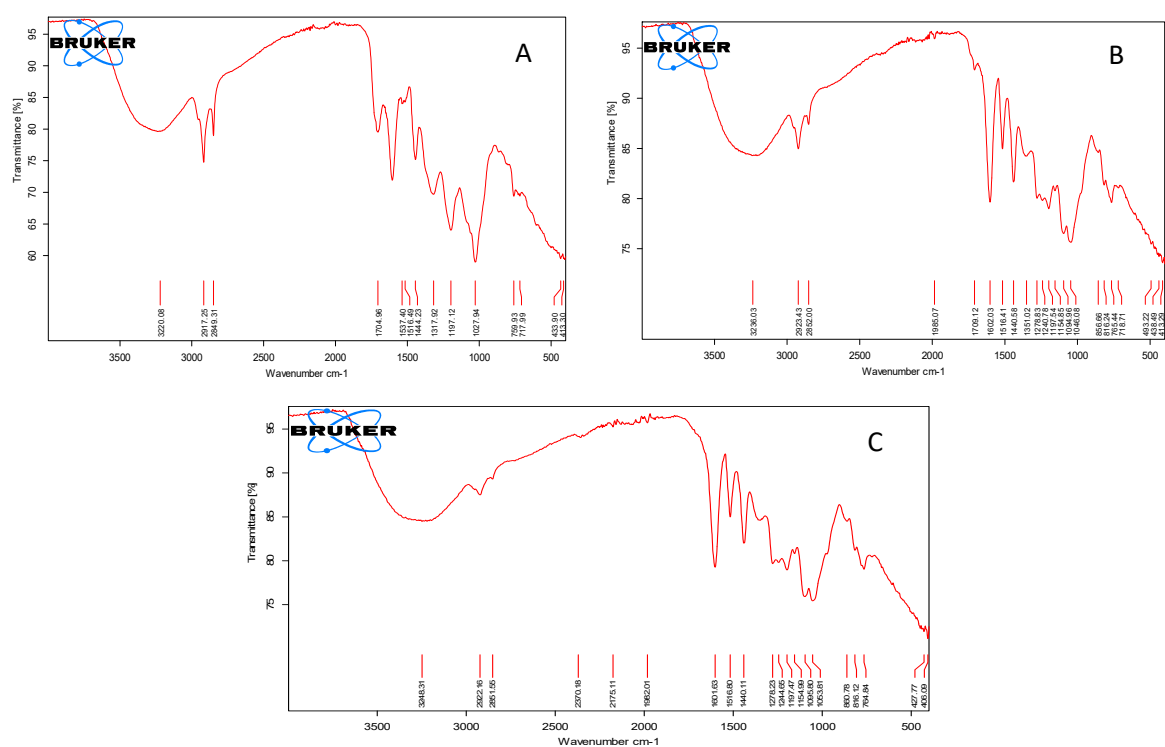

Figure S6 FTIR spectra of *Lannea discolor* leaf (A), stem (B) and root (C) crude methanol extracts.

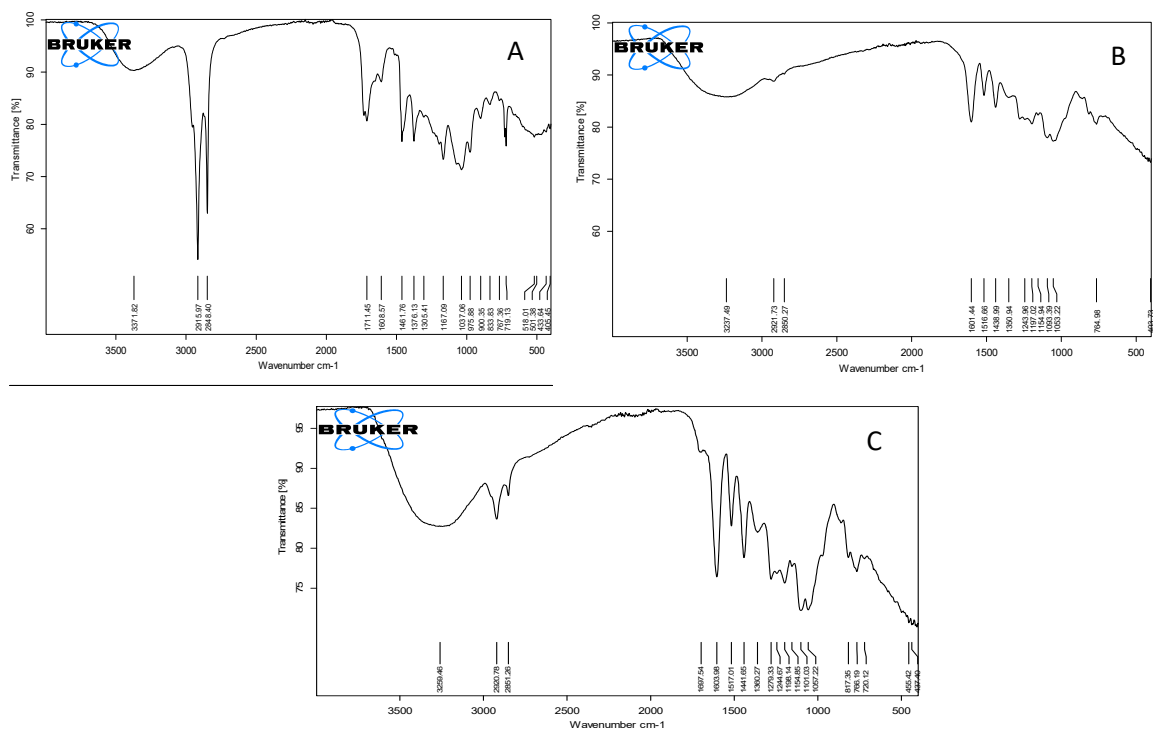

Figure S7 FTIR spectra of *Lanea discolor* leaf (A), stem (B) and root (C) crude acetone extracts.

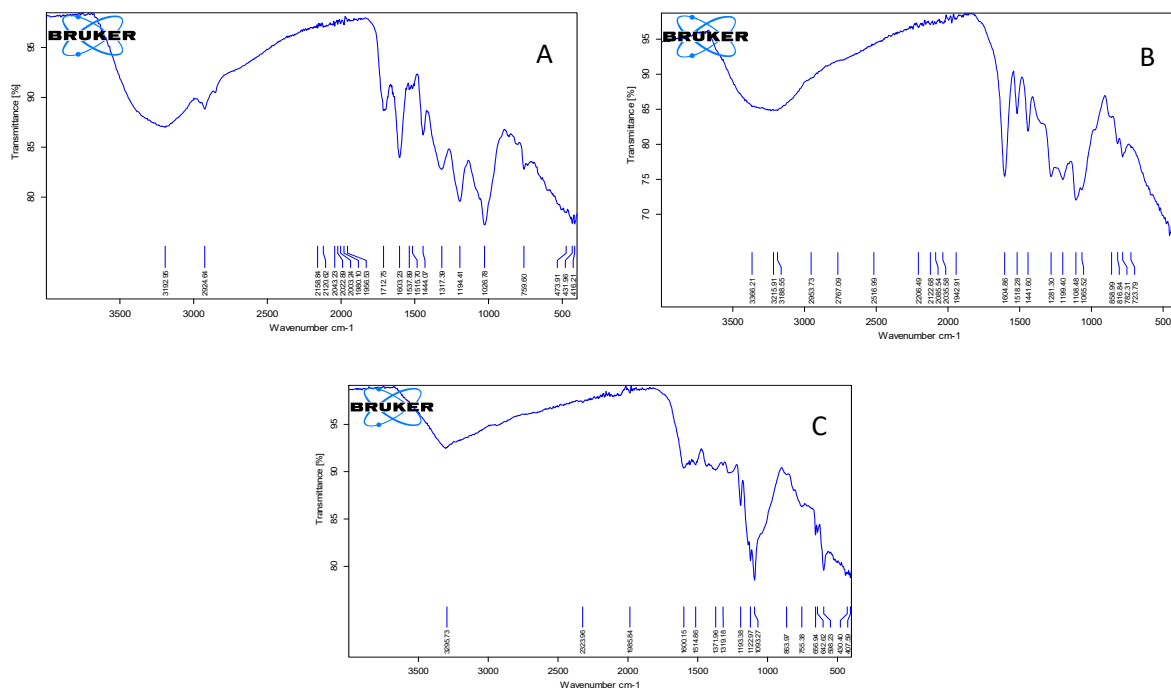

Figure S8 FTIR spectra of *Lanea discolor* leaf (A), stem (B) and root (C) crude water extracts.
